# Supplementary material for: Microwave-assisted efficient one-pot synthesis of N 2 -(tetrazol-5-yl)-6-aryl/heteroaryl-5,6-dihydro-1,3,5-triazine-2,4-diamines
Source: publisher site journal article supplement (doi:10.3762/bjoc.16.142), 2020-07-16

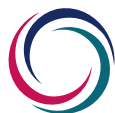

## Supporting Information

for

### **Microwave-assisted efficient one-pot synthesis of $N^2$ -(tetrazol-5-yl)-6-aryl/heteroaryl-5,6-dihydro-1,3,5-triazine-2,4-diamines**

Moustafa Sherief Moustafa, Ramadan Ahmed Mekheimer,  
Saleh Mohammed Al-Mousawi, Mohamed Abd-Elmonem, Hesham El-Zorba,  
Afaf Mohamed Abdel Hameed, Tahany Mahmoud Mohamed and Kamal Usef Sadek

*Beilstein J. Org. Chem.* **2020**, *16*, 1706–1712. [doi:10.3762/bjoc.16.142](https://doi.org/10.3762/bjoc.16.142)

## NMR and mass spectra

**6-(4-Chlorophenyl)-N<sup>2</sup>-(5H-tetrazol-5-yl)-5,6-dihydro-1,3,5-triazine-2,4-diamine (4a).**

This compound is novel.

**4a** <sup>1</sup>H NMR spectrum (600 MHz, DMSO-*d*<sub>6</sub>).

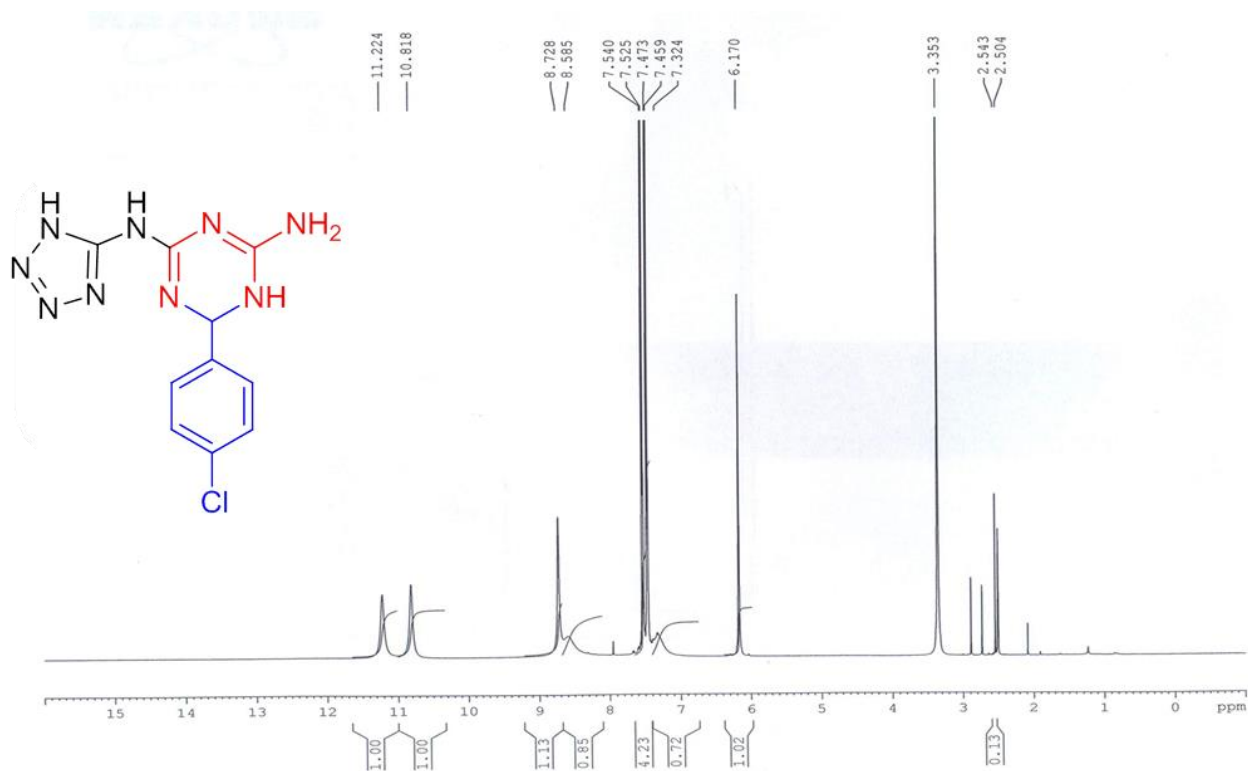

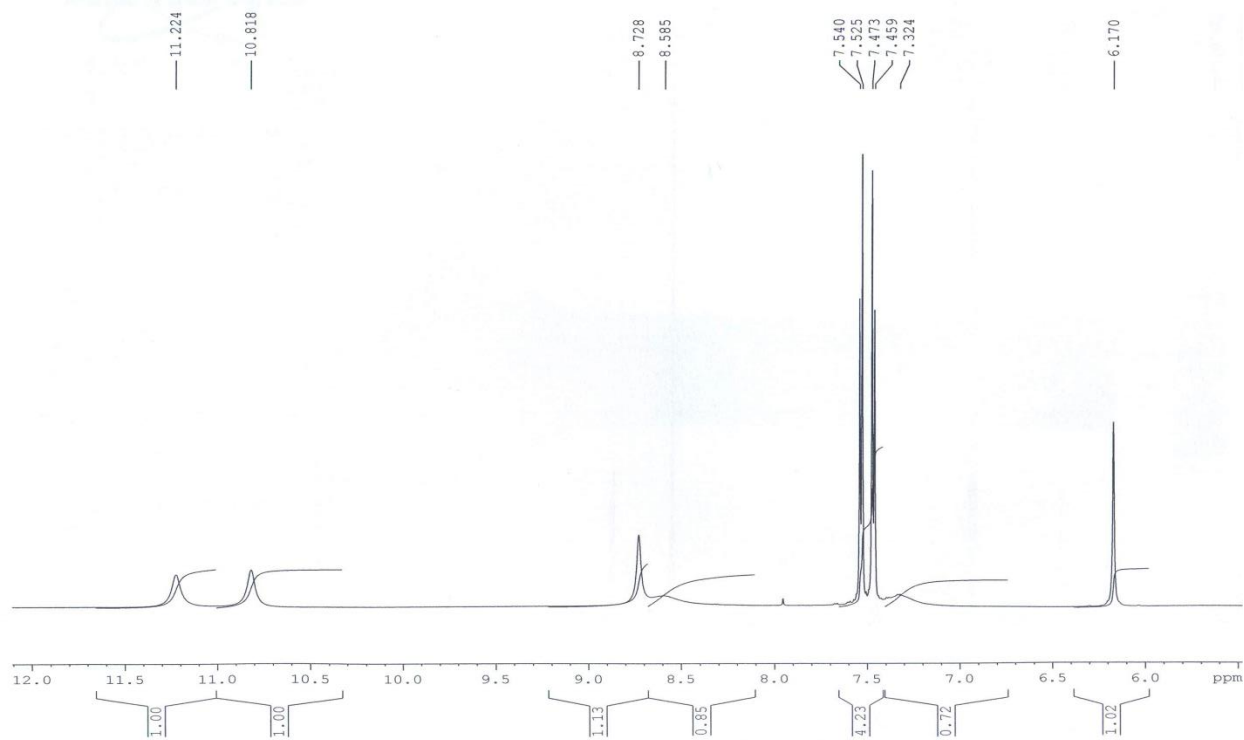

**4a**  $^{13}\text{C}$  NMR spectrum (150 MHz,  $\text{DMSO-}d_6$ ).

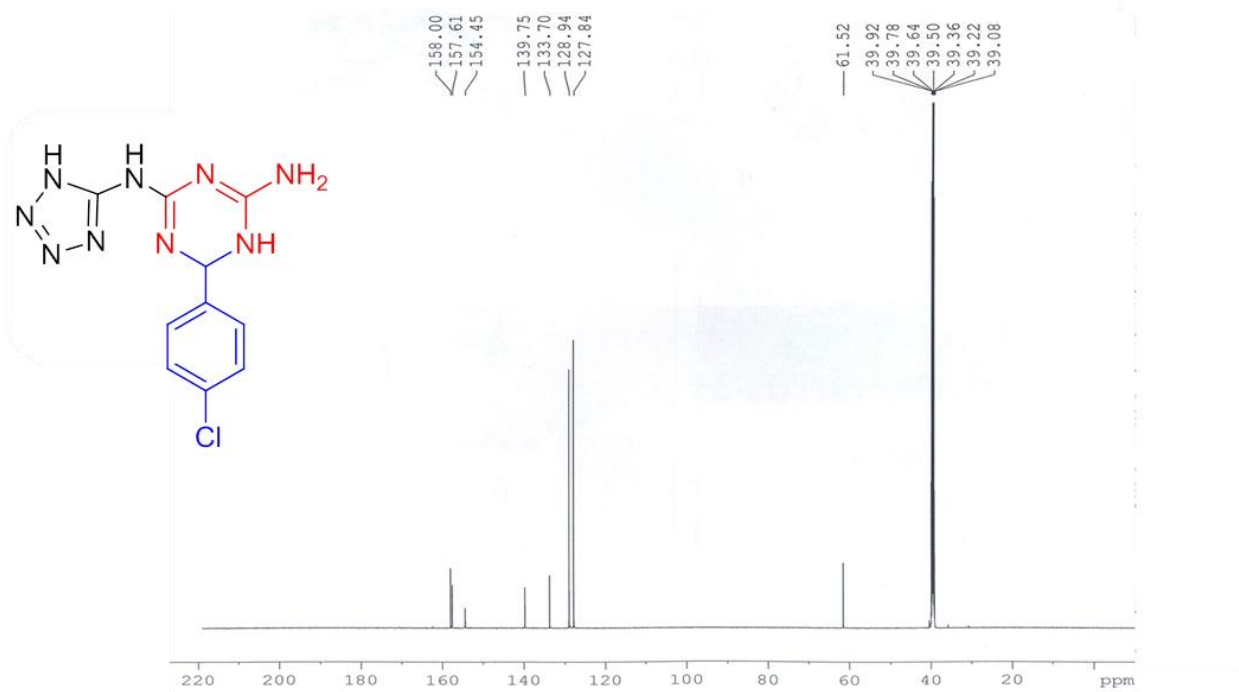

#### 4a Mass spectrum.

K200 #374 RT: 18.14 AV: 1 NL: 2.19E6  
T: + c EI Full ms [49.50-1214.53]

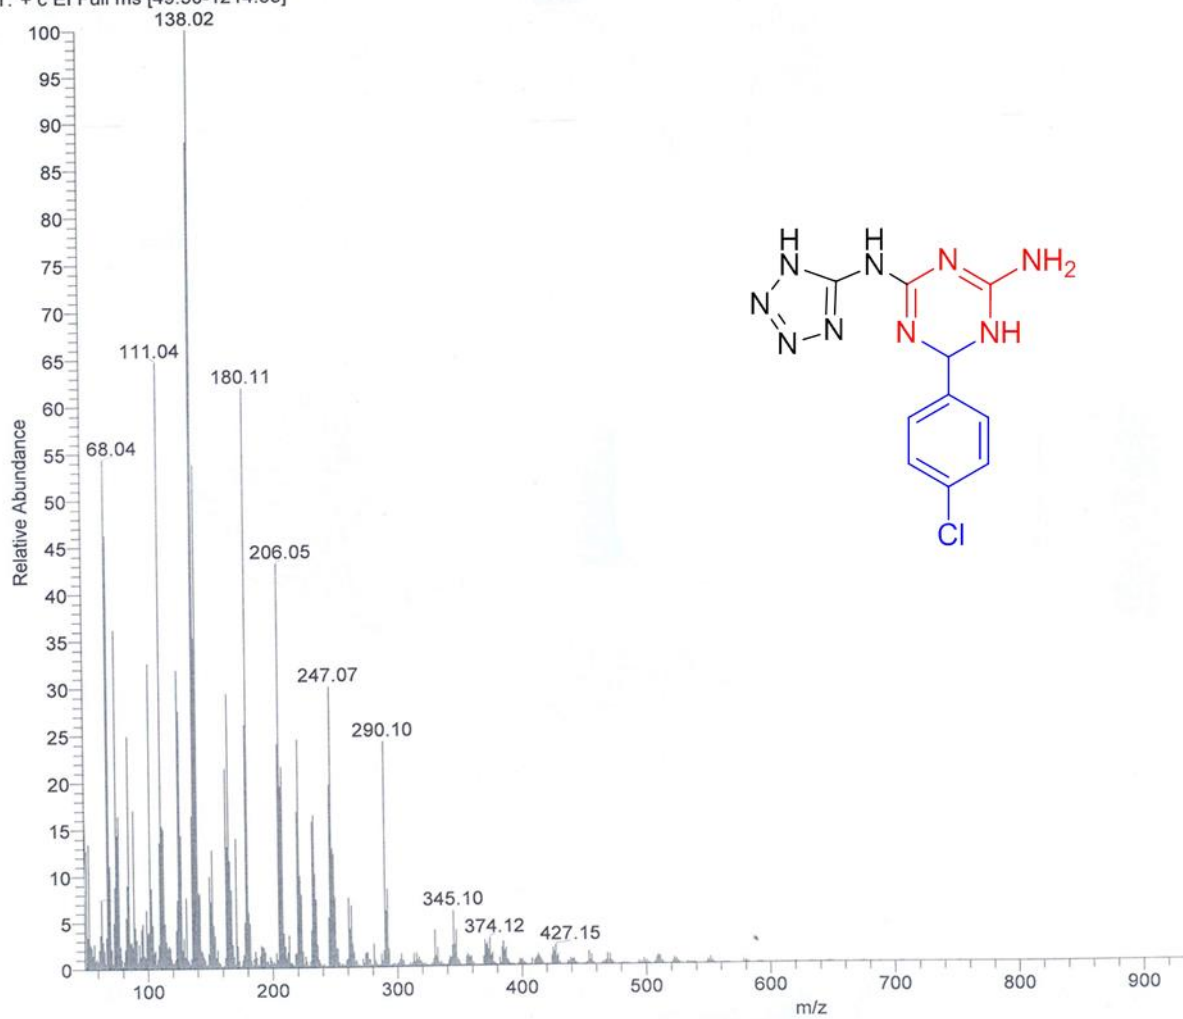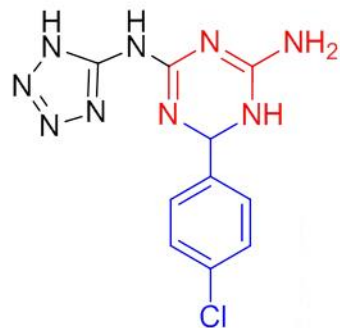

# 6-(4-Methoxyphenyl)-N<sup>2</sup>-(5H-tetrazol-5-yl)-5,6-dihydro-1,3,5-triazine-2,4-diamine (4b).

This compound is novel.

**4b** <sup>1</sup>H NMR spectrum (600 MHz, DMSO-*d*<sub>6</sub>).

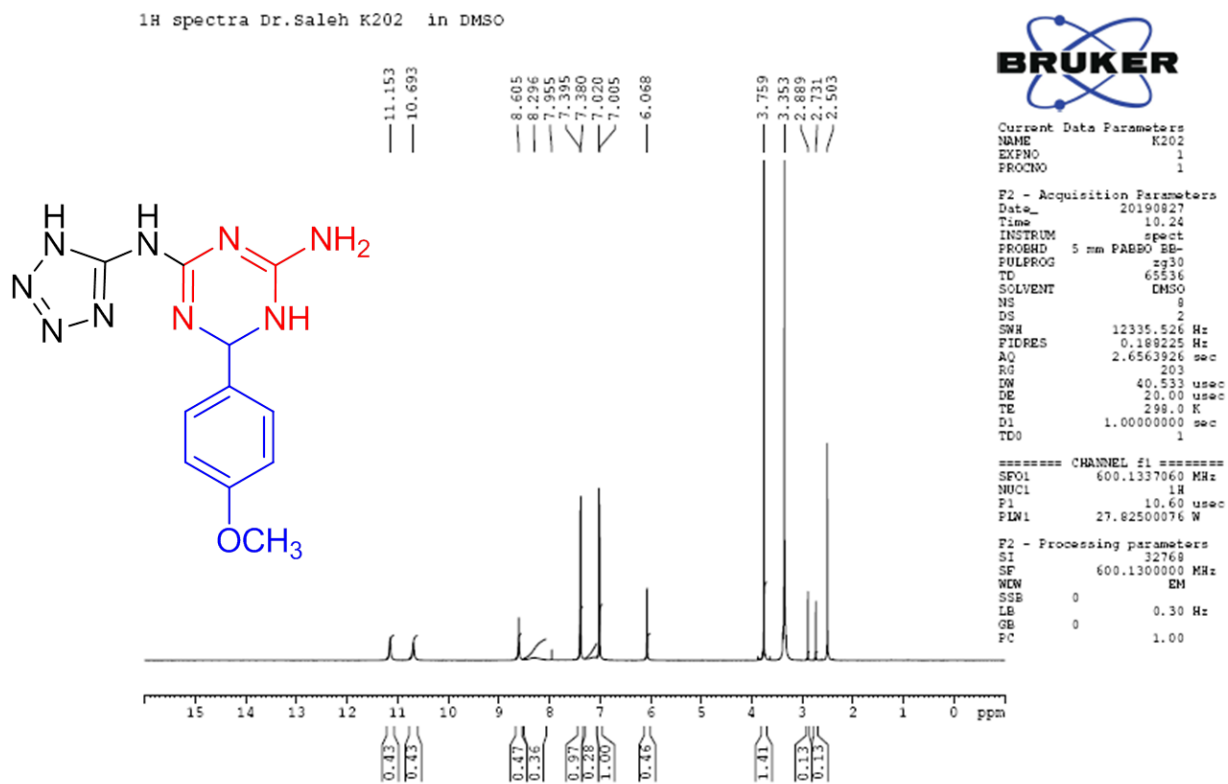

<sup>1</sup>H spectra Dr.Saleh K202 in DMSO

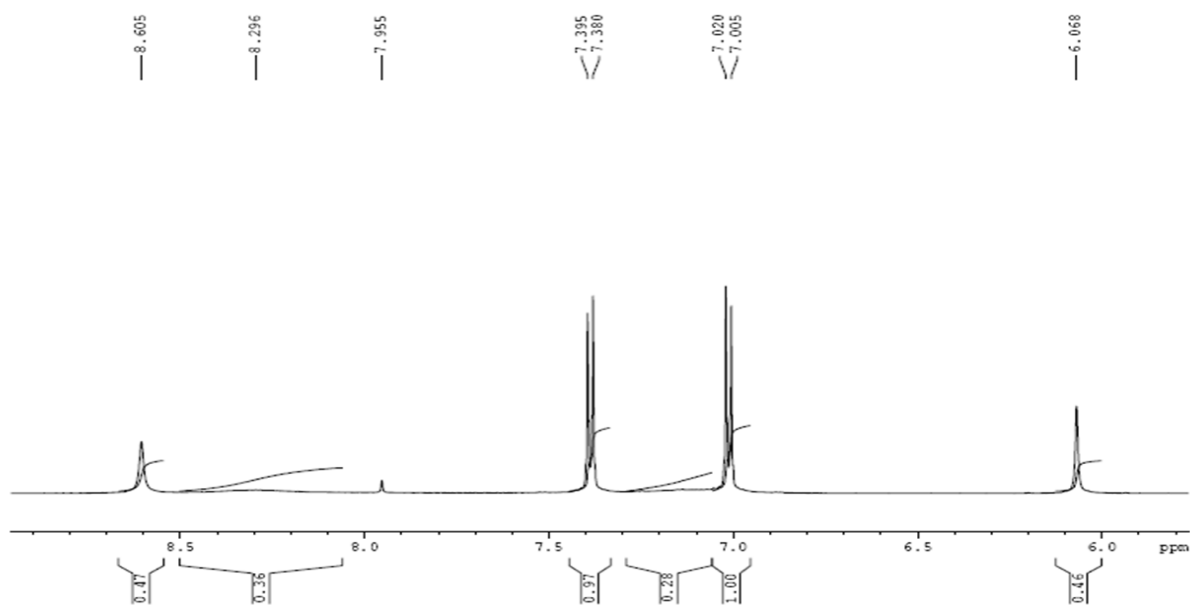

**4b** <sup>13</sup>C NMR spectrum (150 MHz, DMSO-*d*<sub>6</sub>).

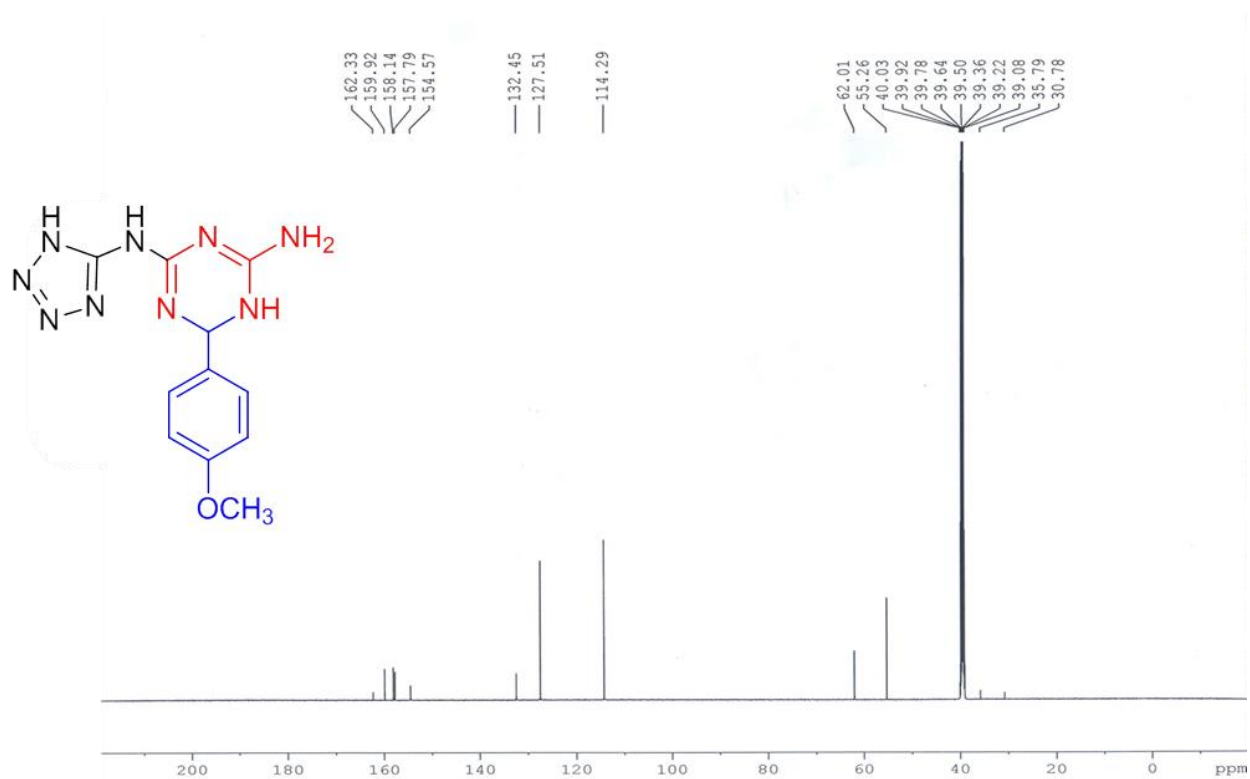

## 4b Mass spectrum.

K202 #307 RT: 14.87 AV: 1 SB: 147 0.49-5.15 , 2.14-4.52 NL: 6.26E5  
T: + c EI Full ms [49.50-1200.50]

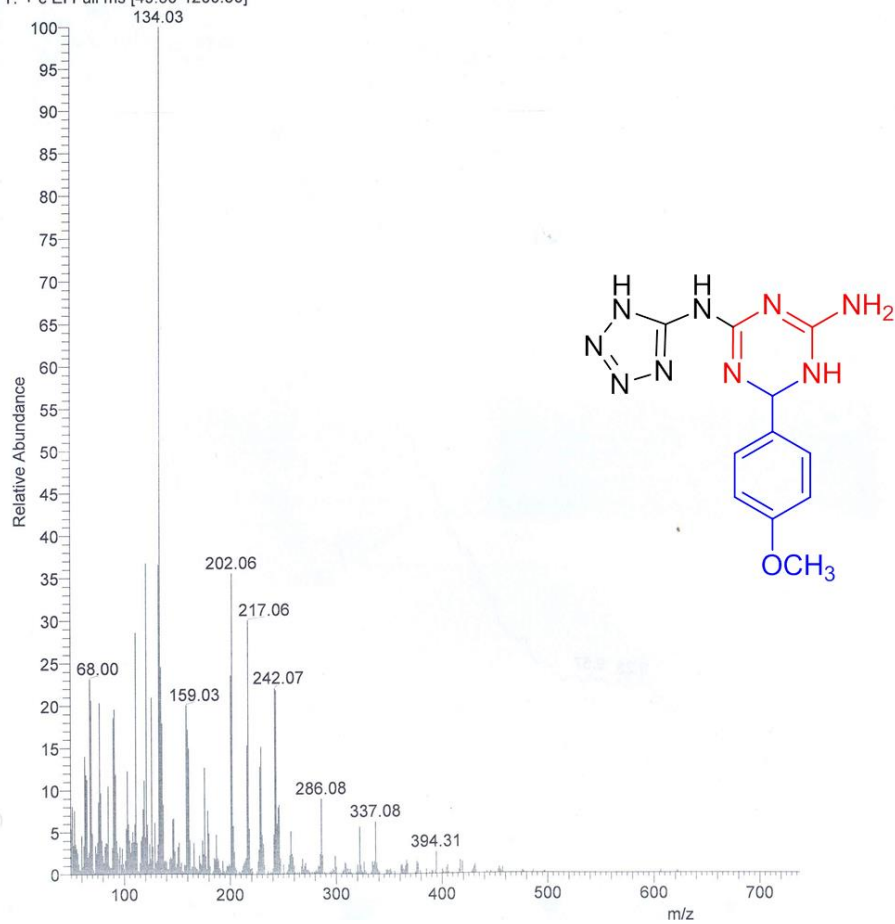

**6-Phenyl-*N*<sup>2</sup>-(5*H*-tetrazol-5-yl)-5,6-dihydro-1,3,5-triazine-2,4-diamine (4c).**

This compound is novel.

**4c** <sup>1</sup>H NMR spectrum (600 MHz, DMSO-*d*<sub>6</sub>).

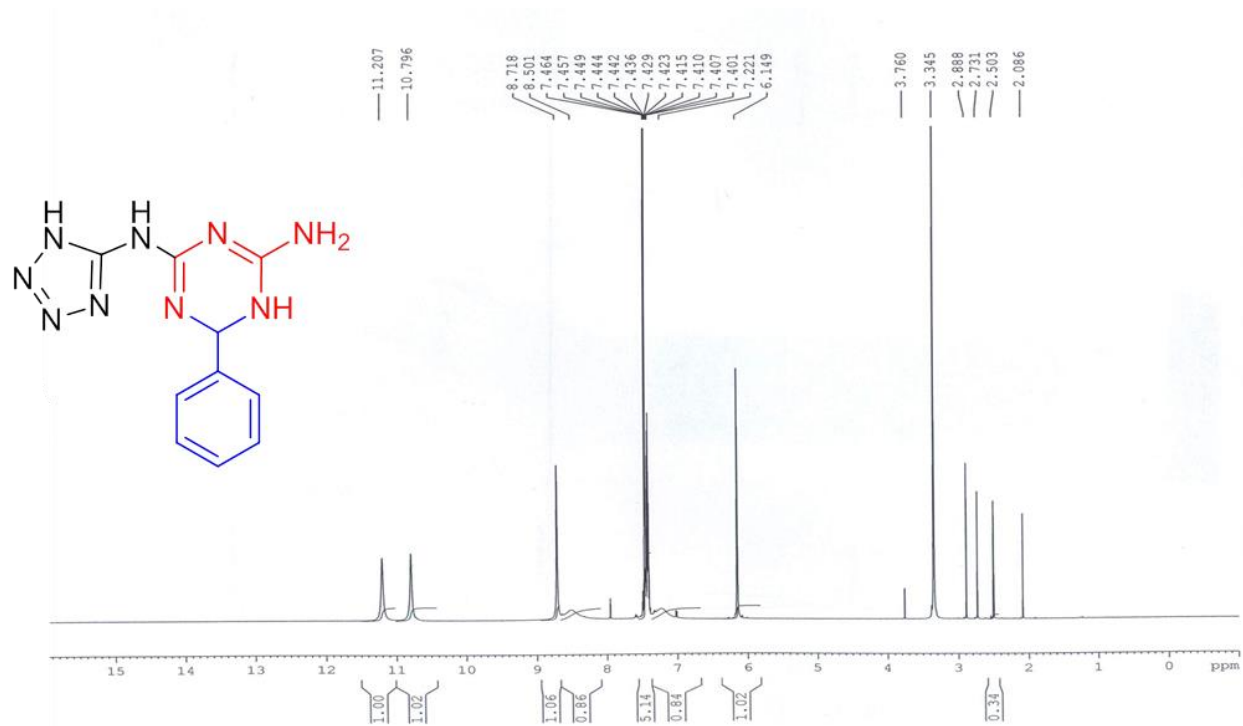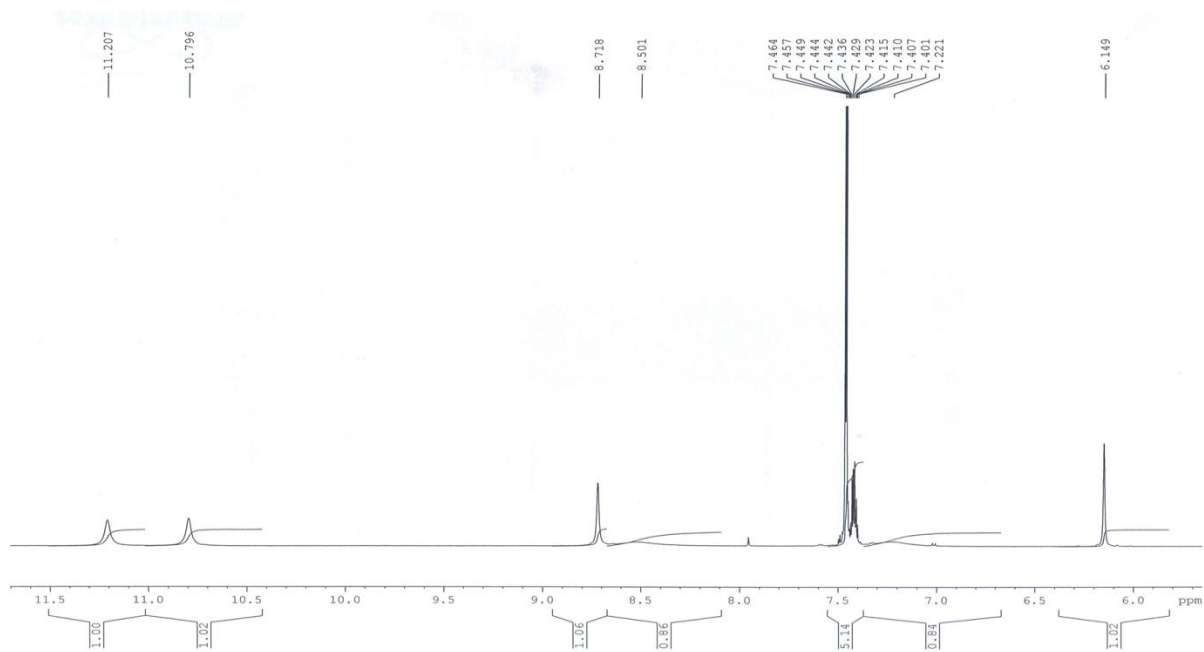



**4c**  $^{13}\text{C}$  NMR spectrum (150 MHz,  $\text{DMSO-}d_6$ ).

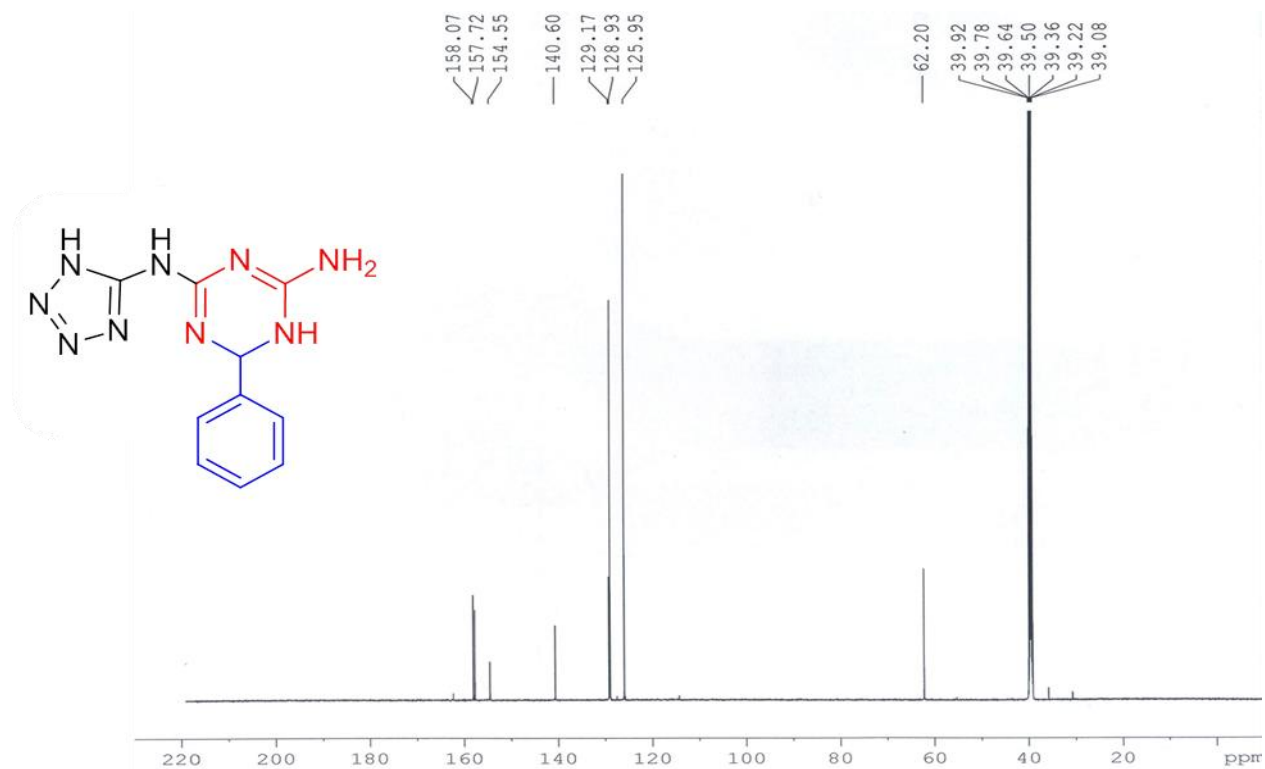

**4c** Mass spectrum.

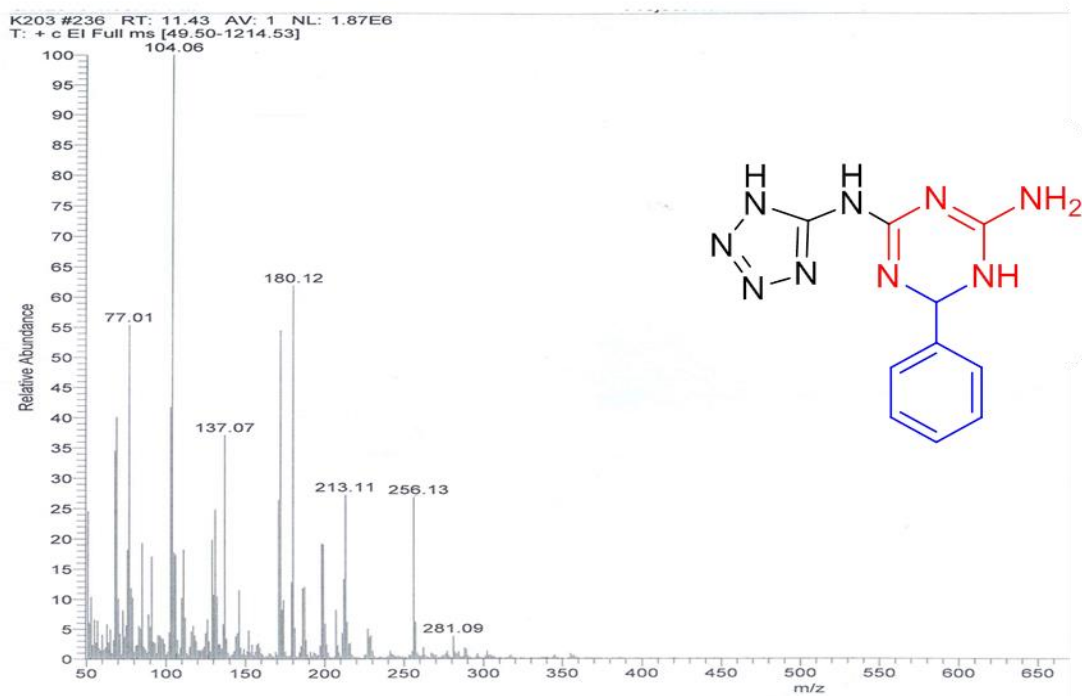

**6-(Benzo[d][1,3]dioxol-5-yl)-N<sup>2</sup>-(5H-tetrazol-5-yl)-5,6-dihydro-1,3,5-triazine-2,4-diamine (4d).**

This compound is novel.

**4d** <sup>1</sup>H NMR spectrum (600 MHz, DMSO-*d*<sub>6</sub>).

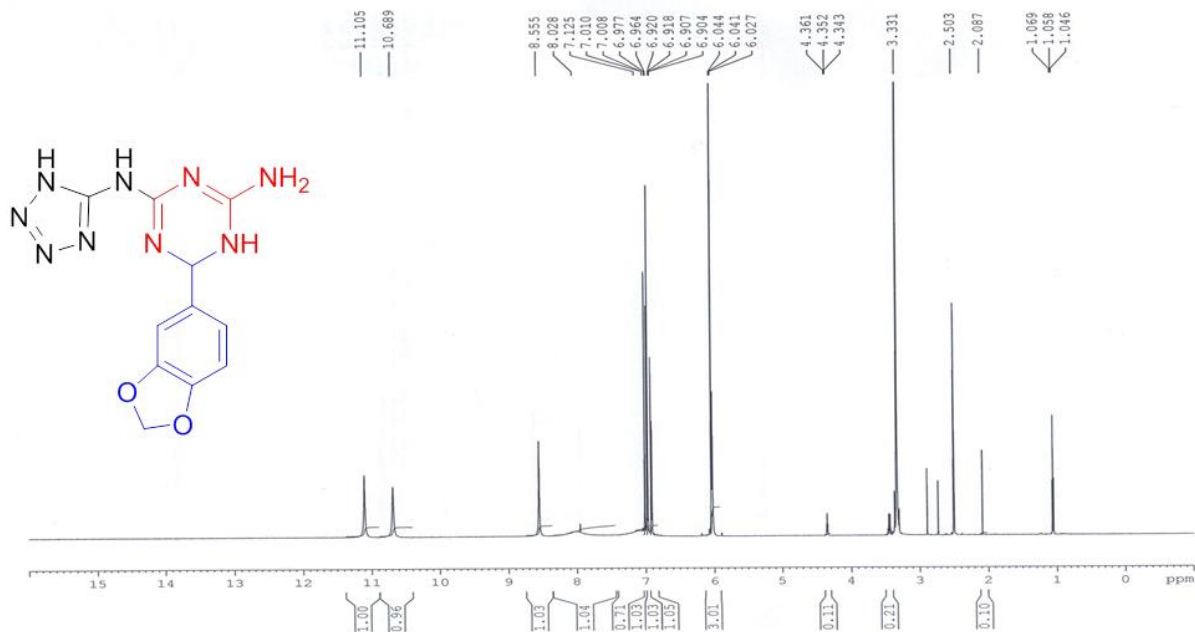

**4d** <sup>13</sup>C NMR spectrum (150 MHz, DMSO-*d*<sub>6</sub>).

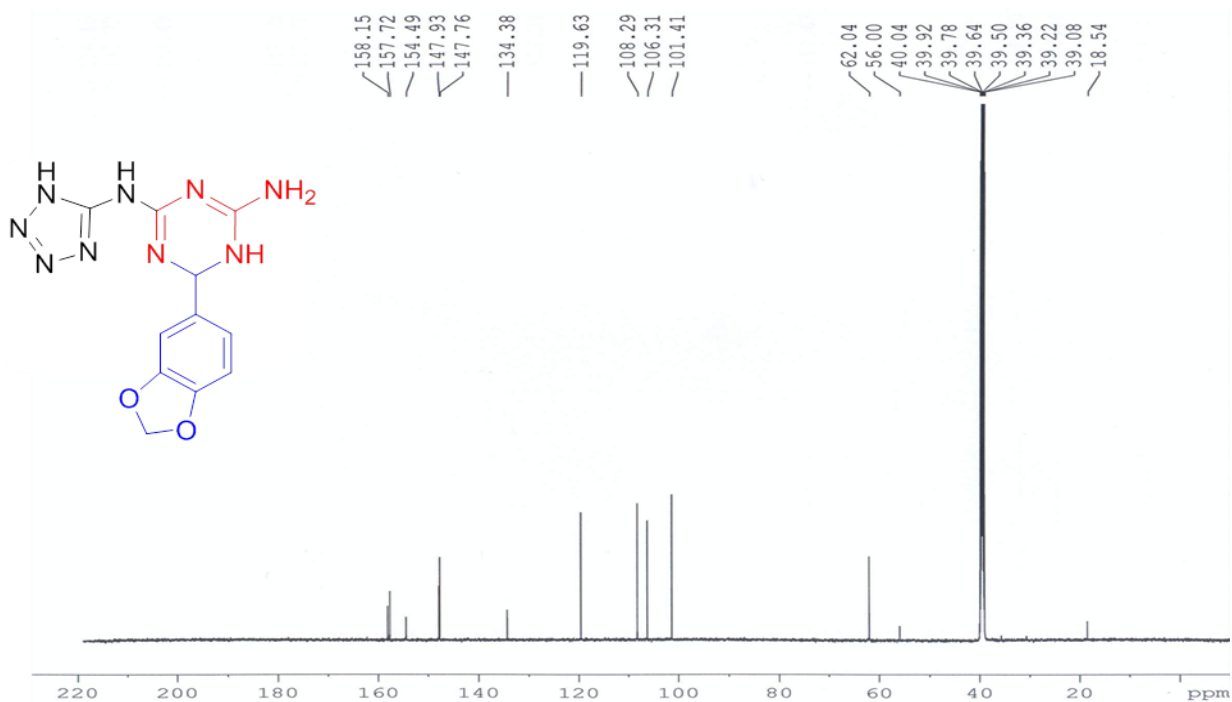

**6-(2-Methoxyphenyl)-N<sup>2</sup>-(5H-tetrazol-5-yl)-5,6-dihydro-1,3,5-triazine-2,4-diamine (4e).**

This compound is novel.

**4e** <sup>1</sup>H NMR spectrum (600 MHz, DMSO-*d*<sub>6</sub>).

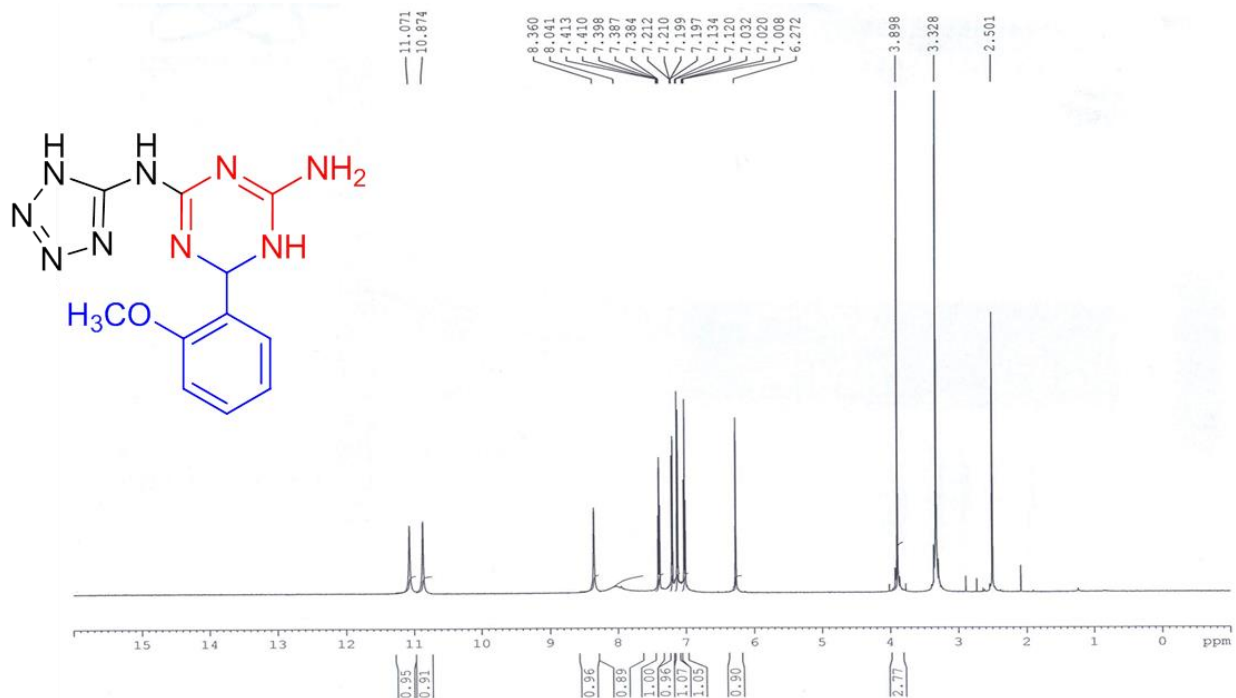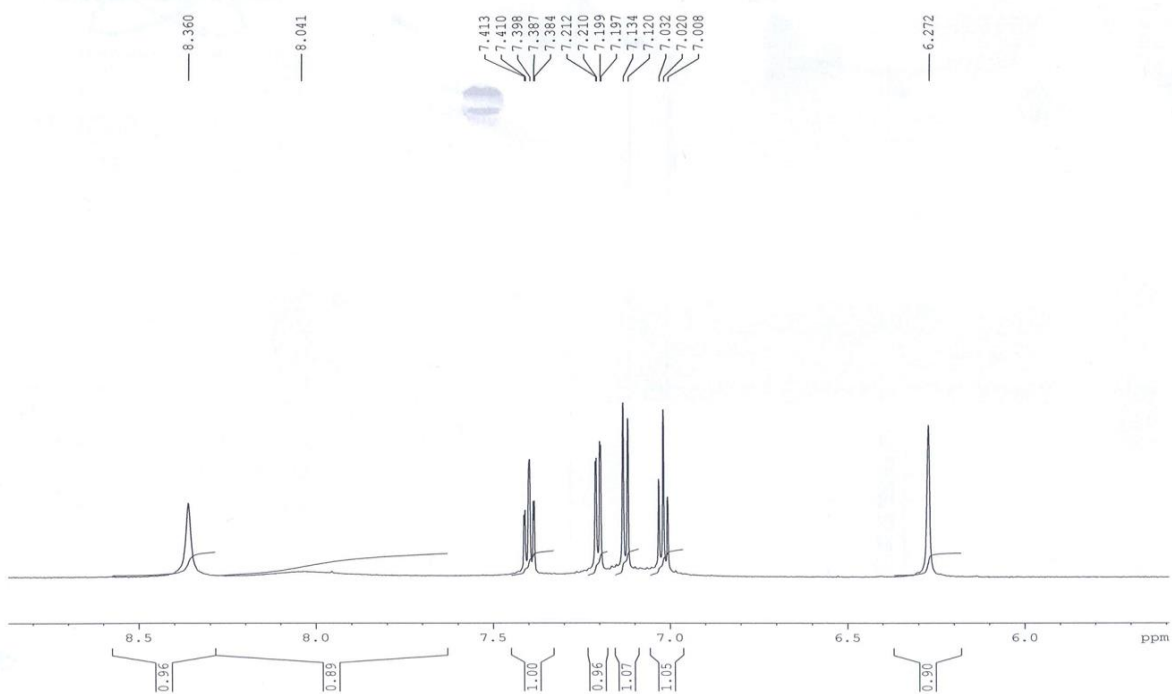

**4e**  $^{13}\text{C}$  NMR spectrum (150 MHz,  $\text{DMSO-}d_6$ ).

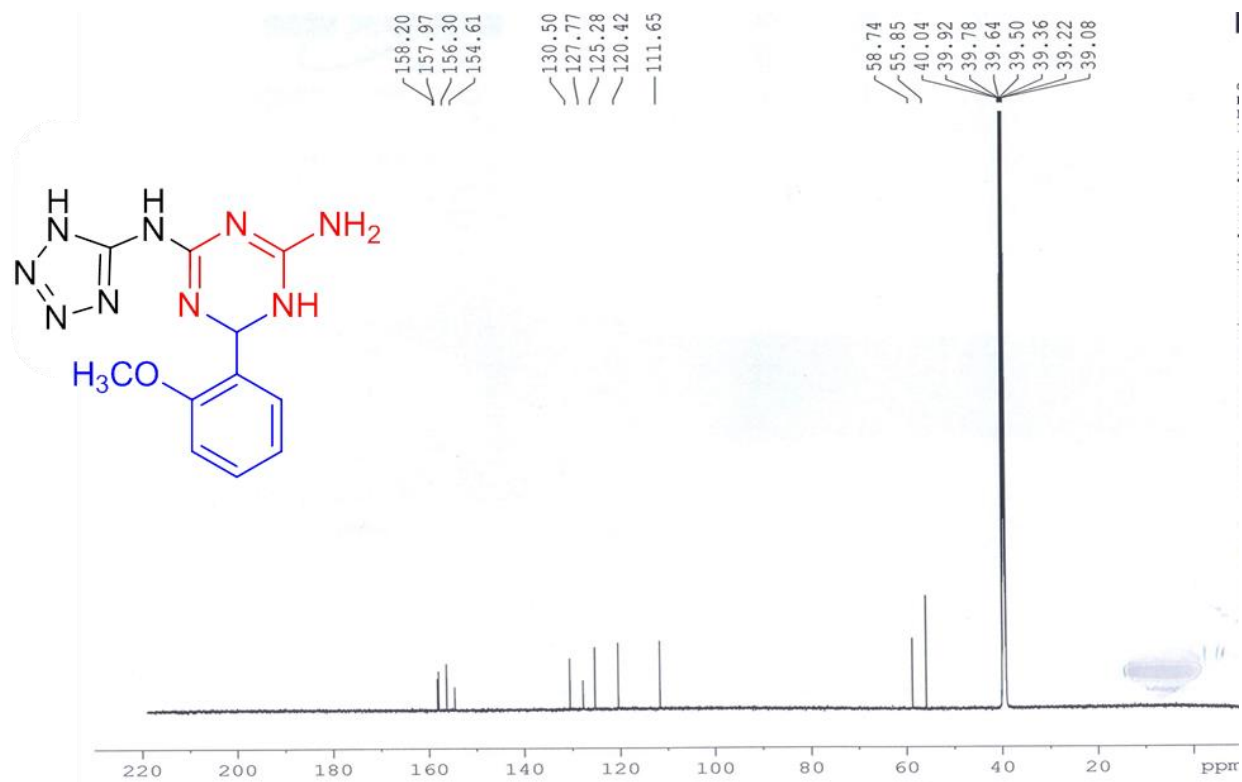

4e Mass spectrum.

K205 #253 RT: 12.25 AV: 1 NL: 3.18E6  
T: + c EI Full ms [49.50-1200.50]

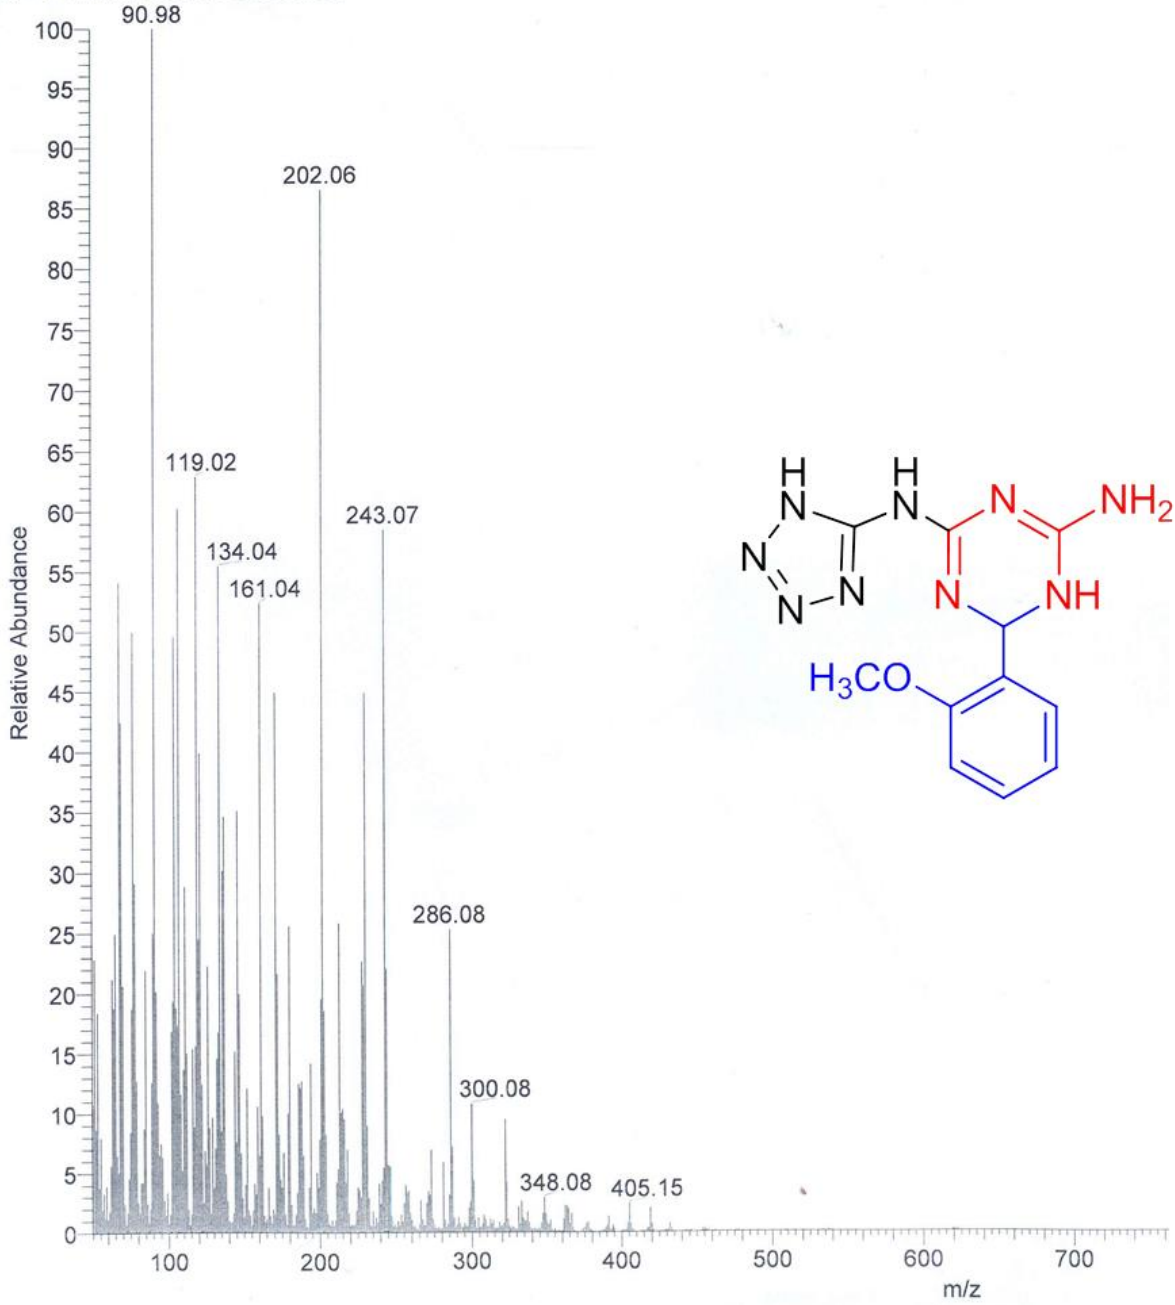

**6-(4-Methylphenyl)-N<sup>2</sup>-(5H-tetrazol-5-yl)-5,6-dihydro-1,3,5-triazine-2,4-diamine (4f).**

This compound is novel.

**4f** <sup>1</sup>H NMR spectrum (600 MHz, DMSO-*d*<sub>6</sub>).

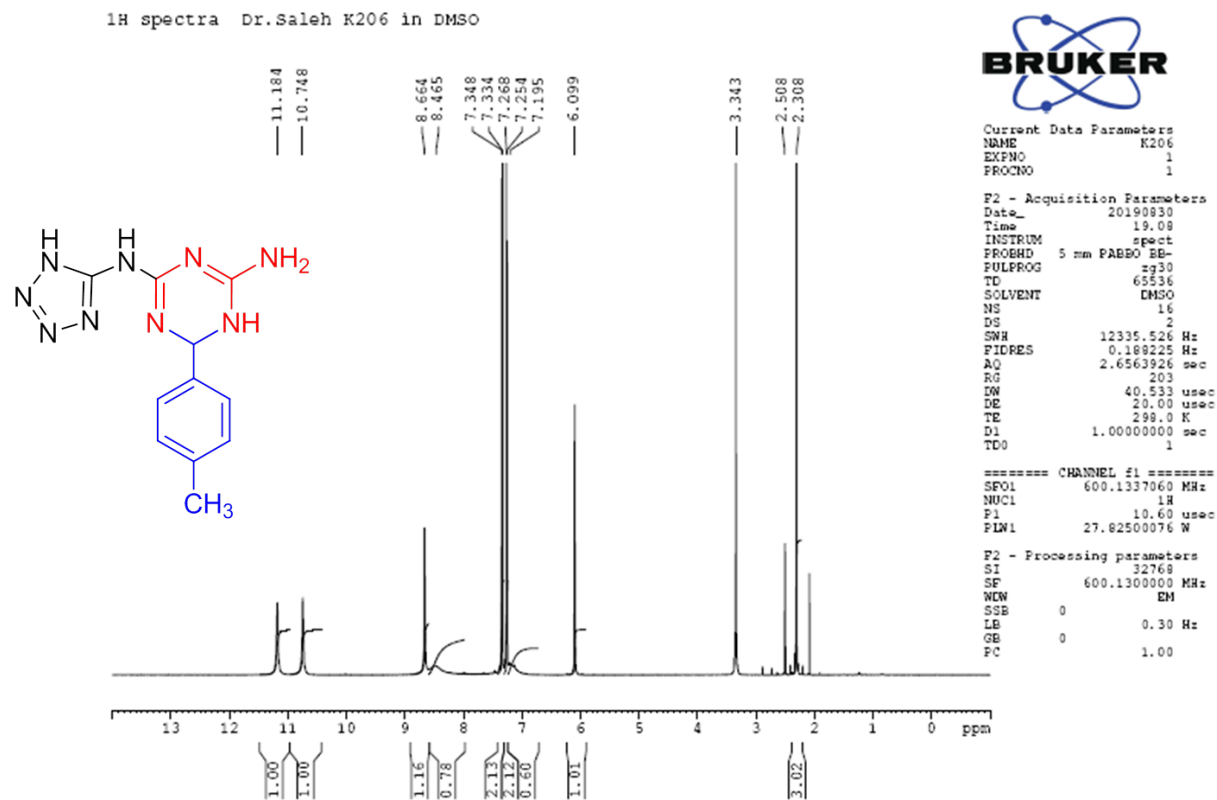

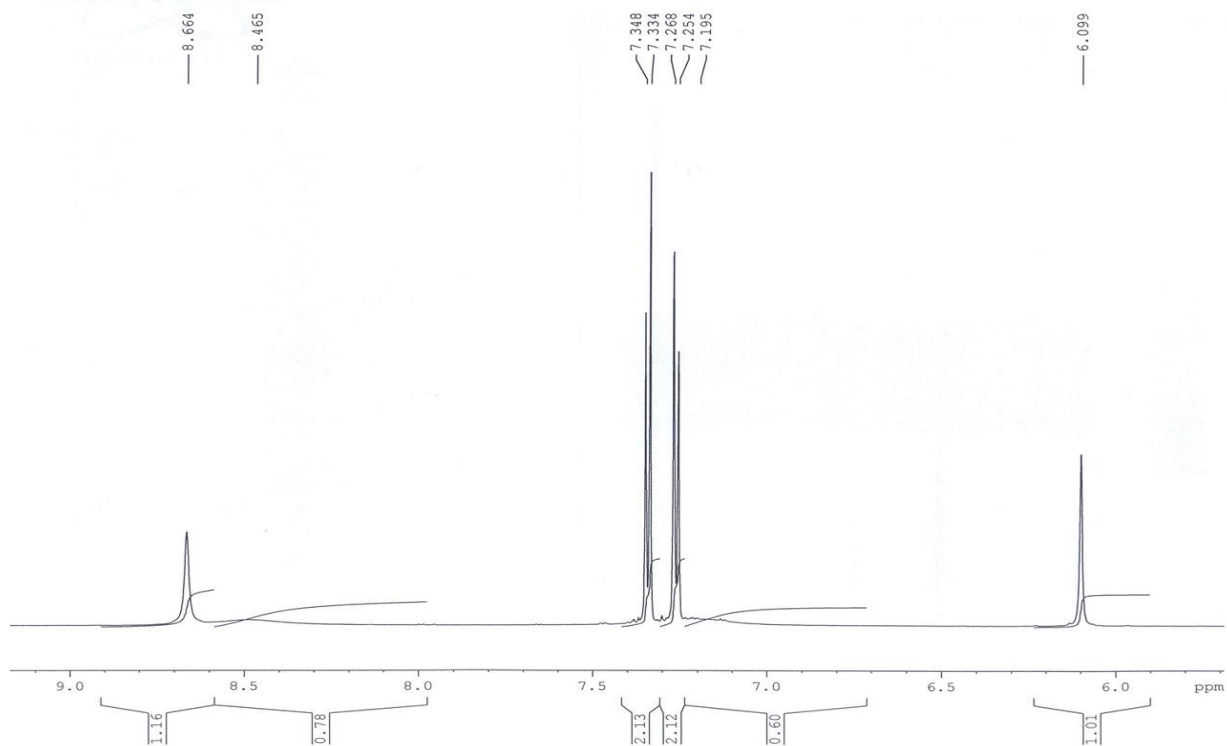

**4f**  $^{13}\text{C}$  NMR spectrum (150 MHz,  $\text{DMSO-d}_6$ ).

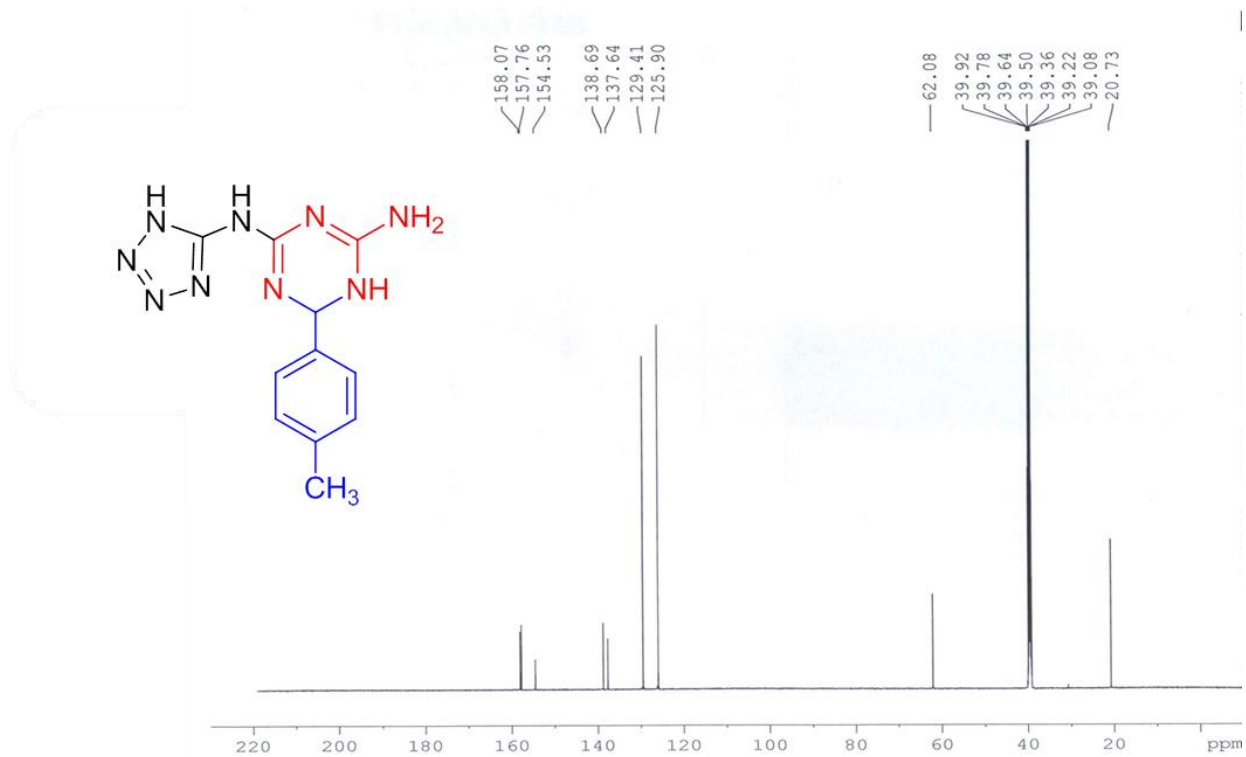

**6-(2-Chlorophenyl)-N<sup>2</sup>-(5H-tetrazol-5-yl)-5,6-dihydro-1,3,5-triazine-2,4-diamine (4g).**

This compound is novel.

**4g** <sup>1</sup>H NMR spectrum (600 MHz, DMSO-*d*<sub>6</sub>).

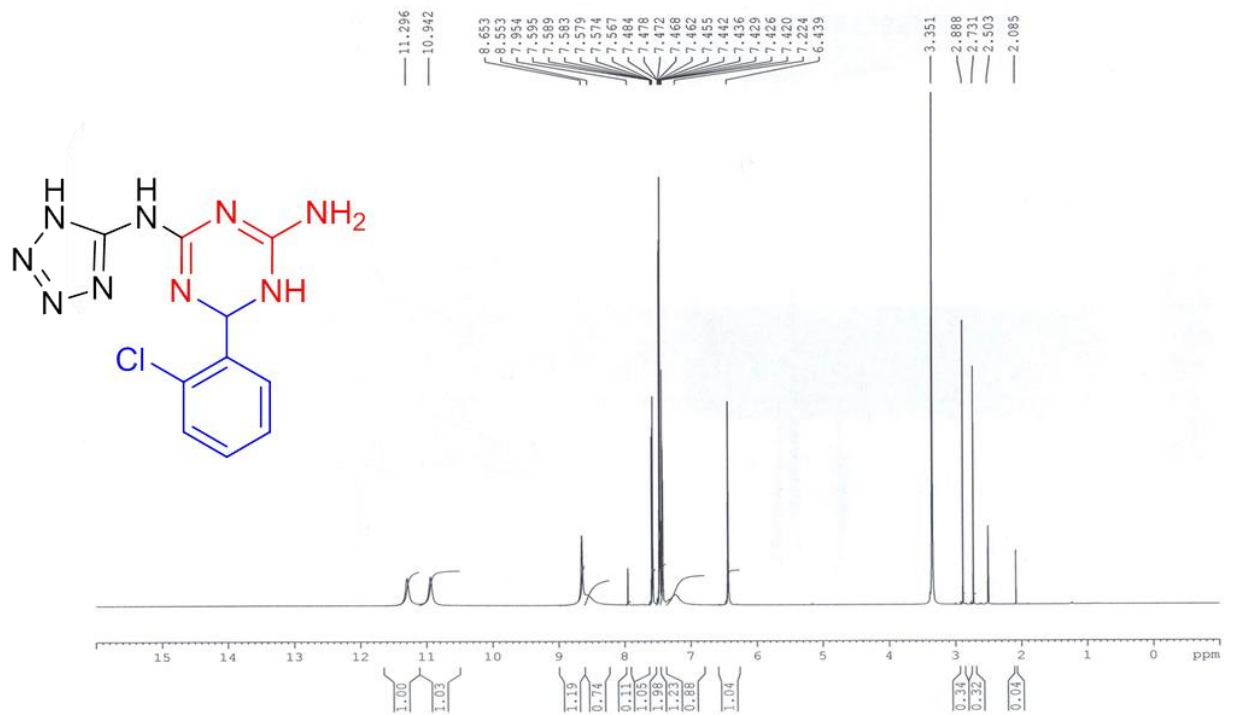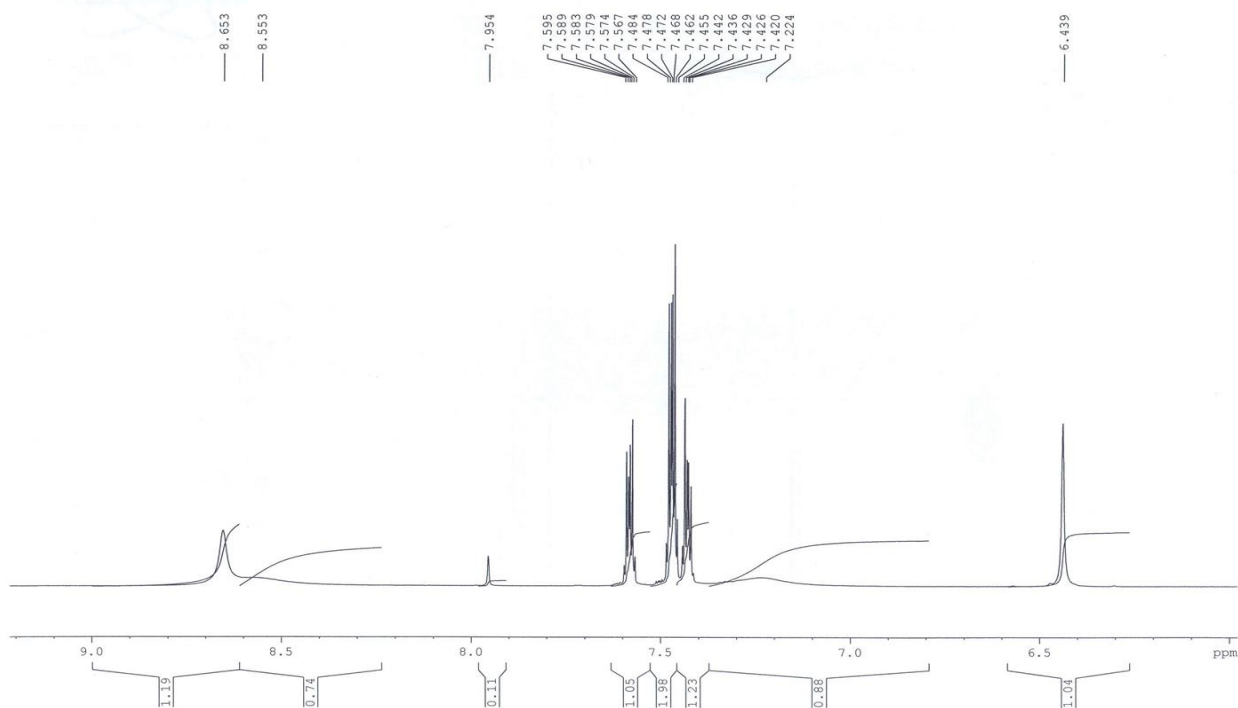



**4g**  $^{13}\text{C}$  NMR spectrum (150 MHz,  $\text{DMSO-}d_6$ ).

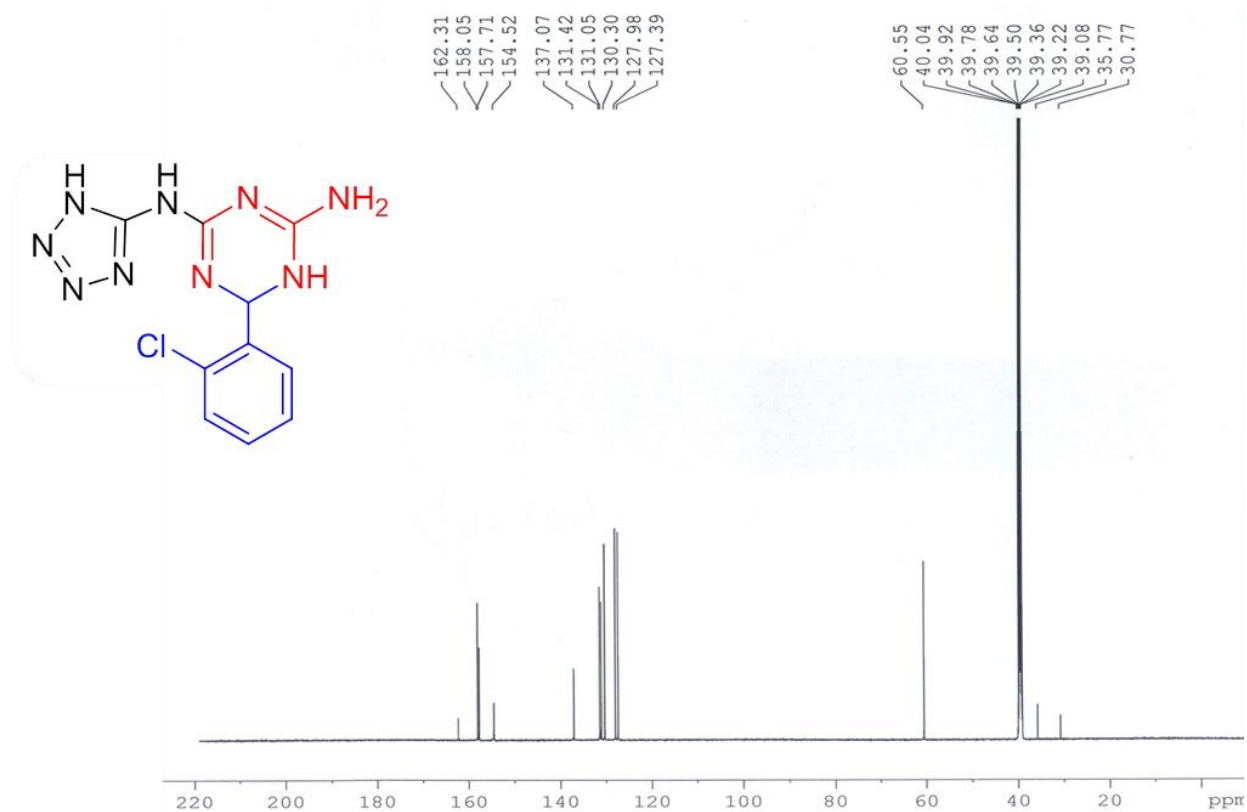

**6-(3-Nitrophenyl)-N<sup>2</sup>-(5H-tetrazol-5-yl)-5,6-dihydro-1,3,5-triazine-2,4-diamine (4h).**

This compound is novel.

**4h** <sup>1</sup>H NMR spectrum (600 MHz, DMSO-*d*<sub>6</sub>).

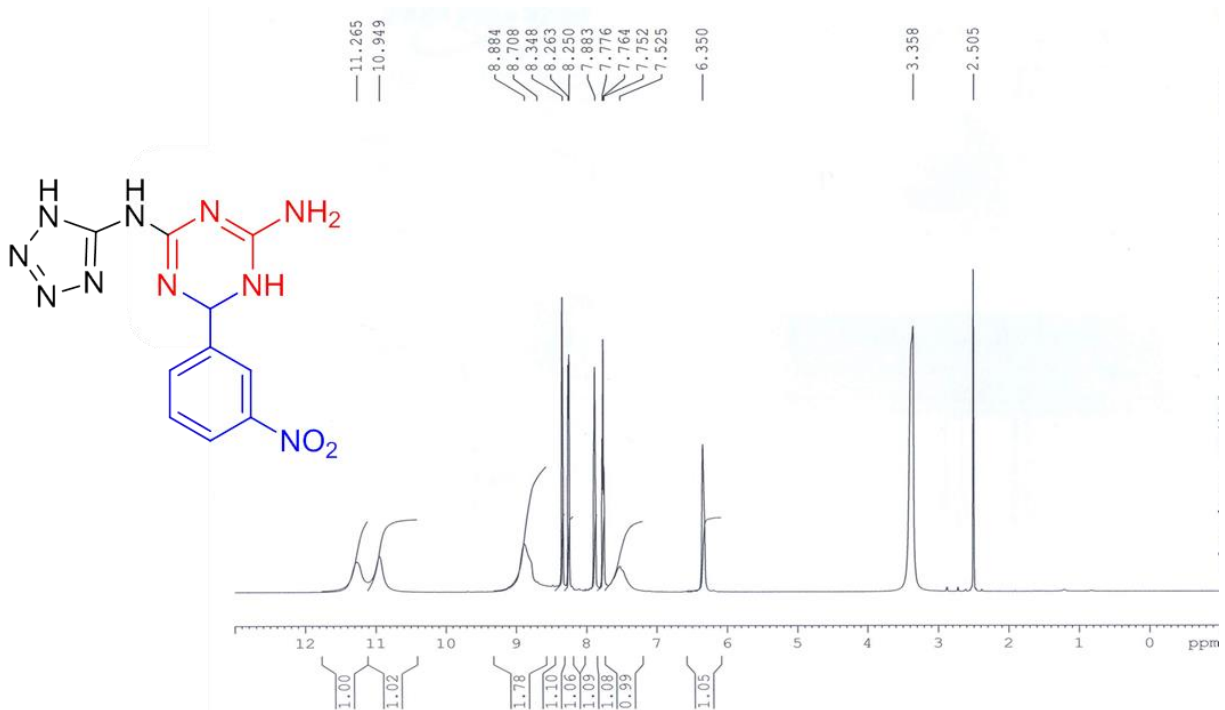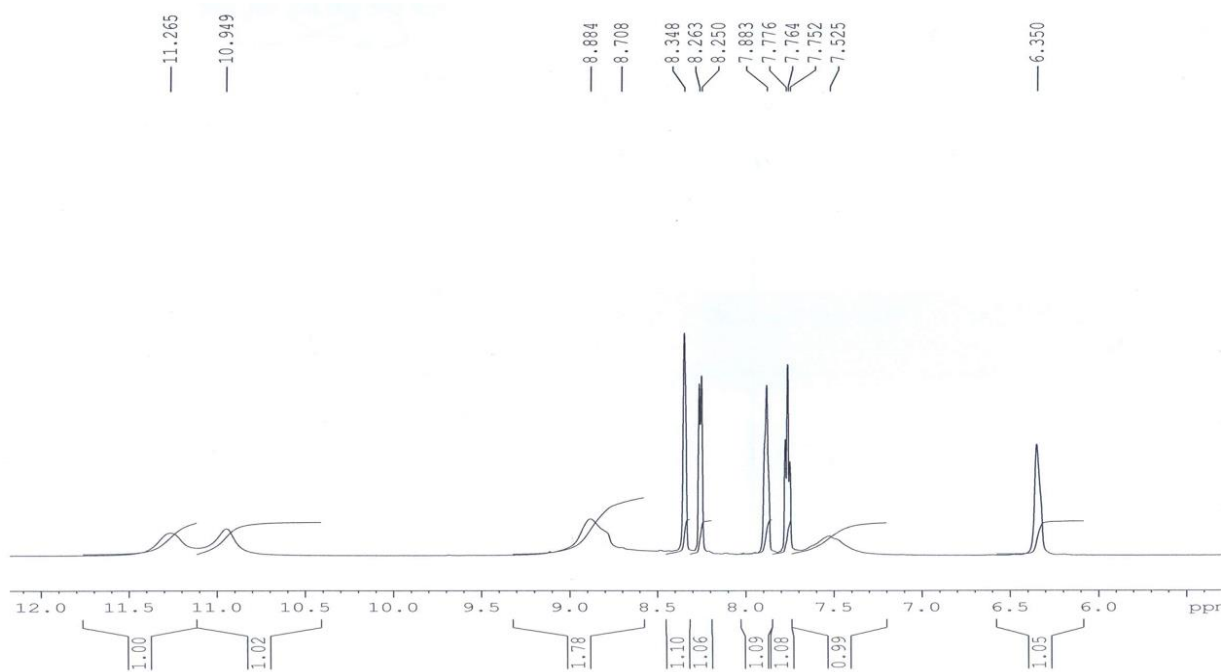

**4h**  $^{13}\text{C}$  NMR spectrum (150 MHz,  $\text{DMSO-}d_6$ ).

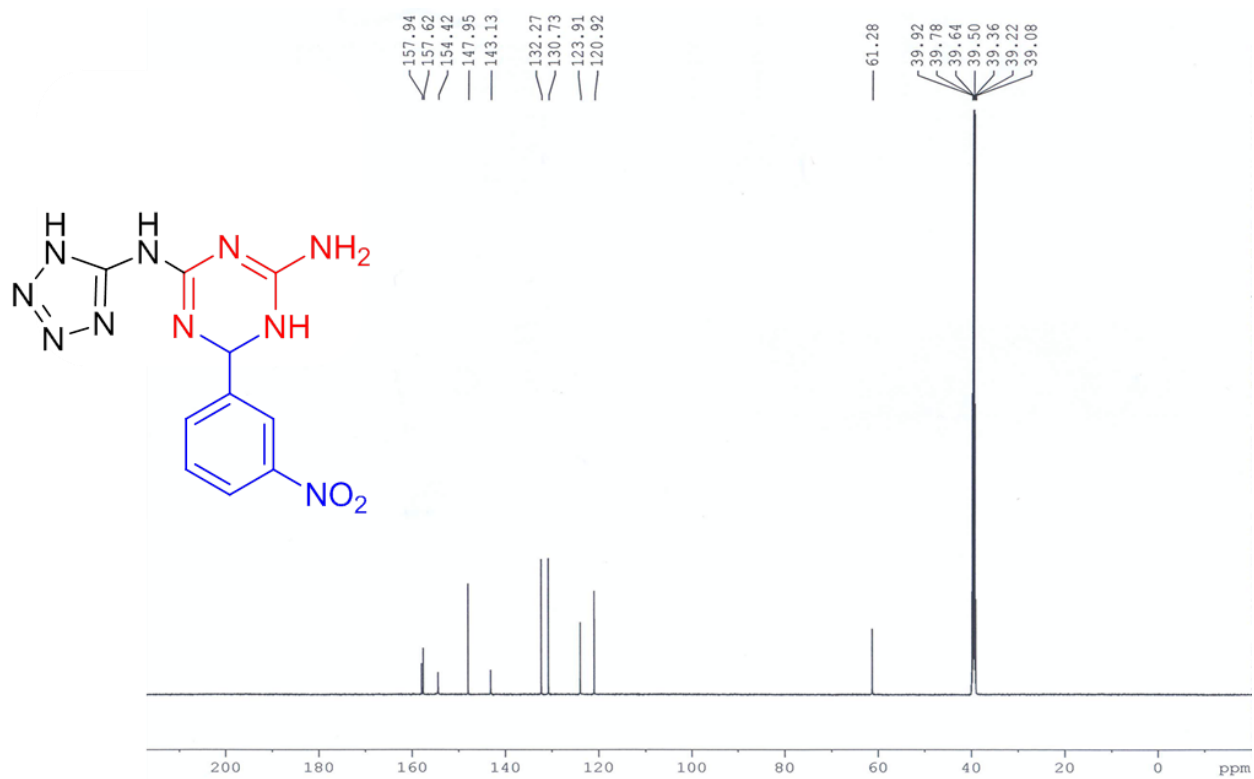

**6-(Furan-2-yl)-N<sup>2</sup>-(5H-tetrazol-5-yl)-5,6-dihydro-1,3,5-triazine-2,4-diamine (4i).**

This compound is novel.

**4i** <sup>1</sup>H NMR spectrum (600 MHz, DMSO-*d*<sub>6</sub>).

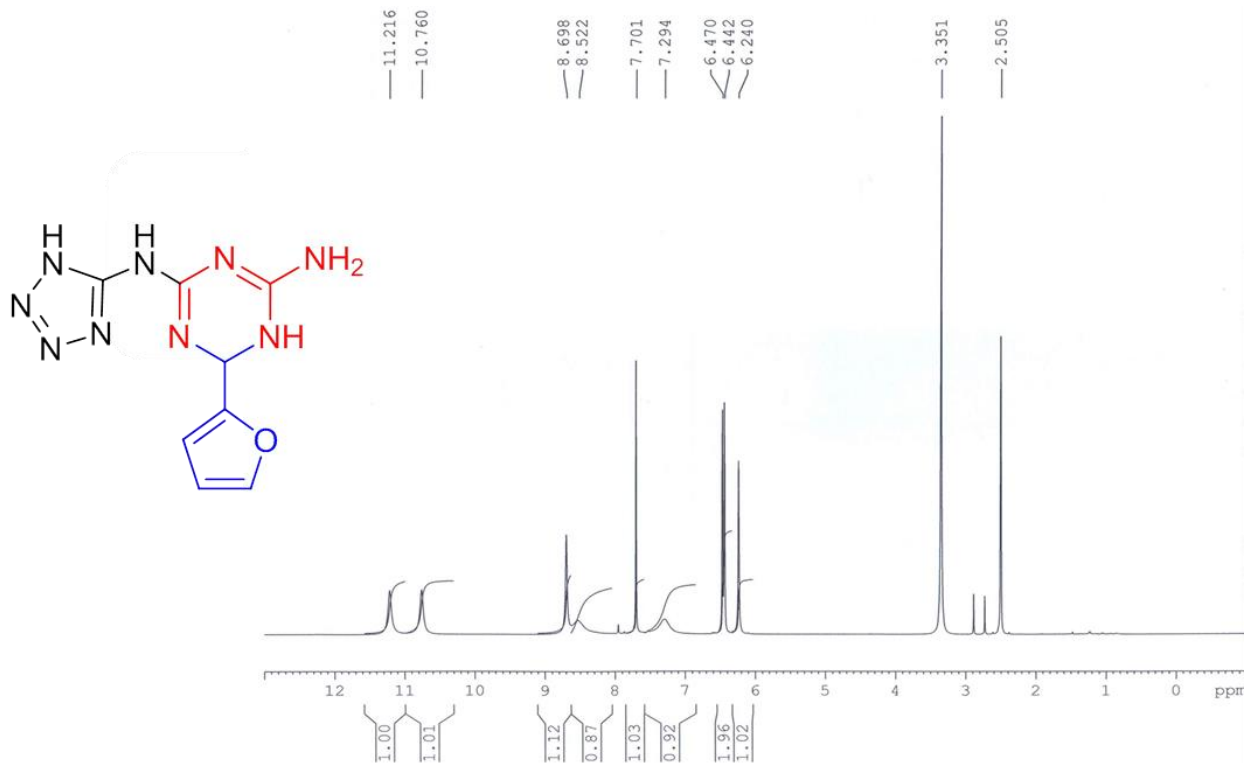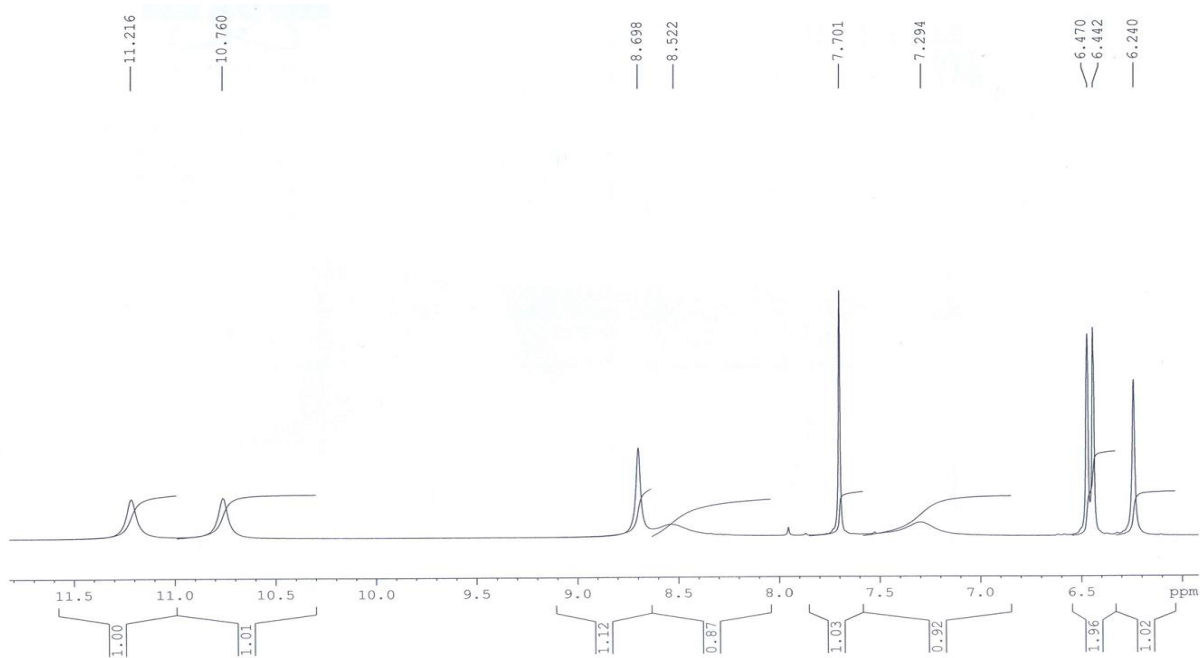

**4i**  $^{13}\text{C}$  NMR spectrum (150 MHz,  $\text{DMSO-}d_6$ ).

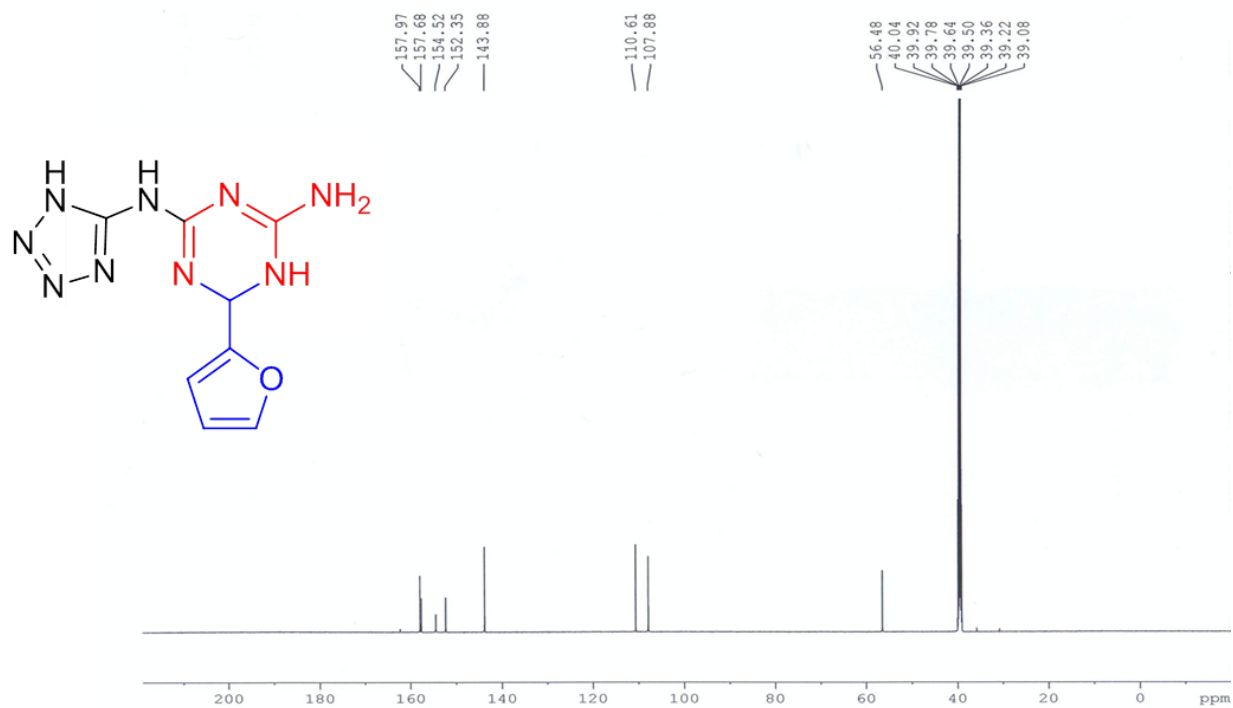

## 4i Mass spectrum

K10 #243 RT: 11.77 AV: 1 NL: 1.15E6  
T: + c EI Full ms [49.50-1214.53]

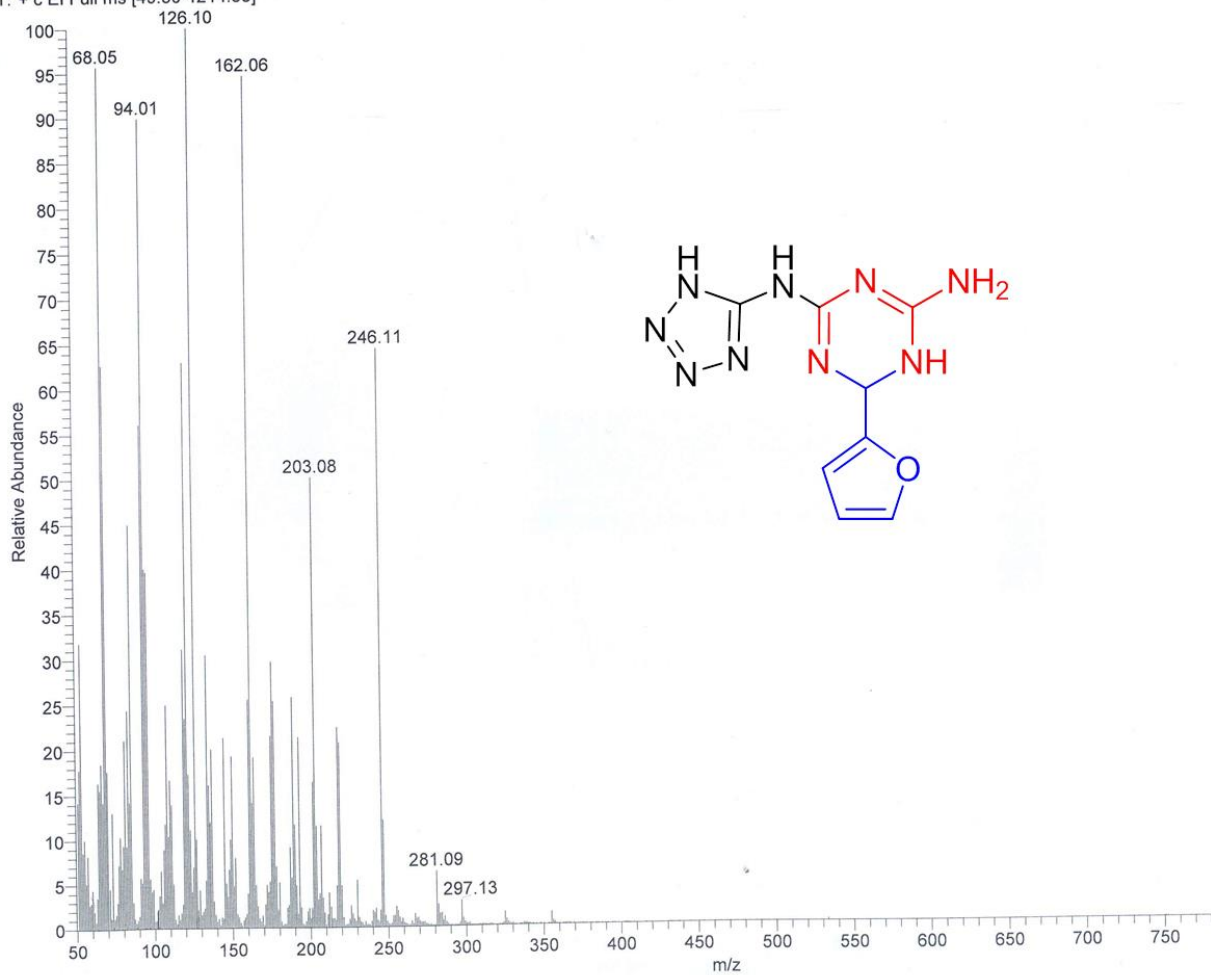

**6-(4-*N,N*-Dimethylaminophenyl)-*N*<sup>2</sup>-(5*H*-tetrazol-5-yl)-5,6-dihydro-1,3,5-triazine-2,4-diamine (4j).**

This compound is novel.

**4j** <sup>1</sup>H NMR spectrum (600 MHz, DMSO-*d*<sub>6</sub>).

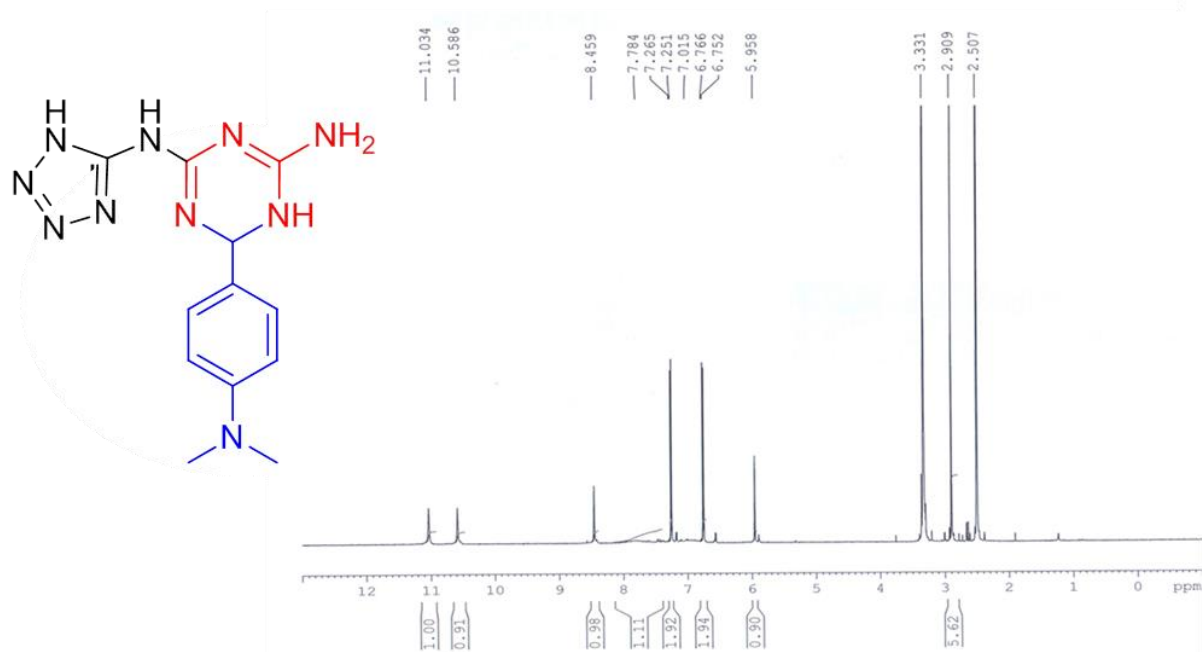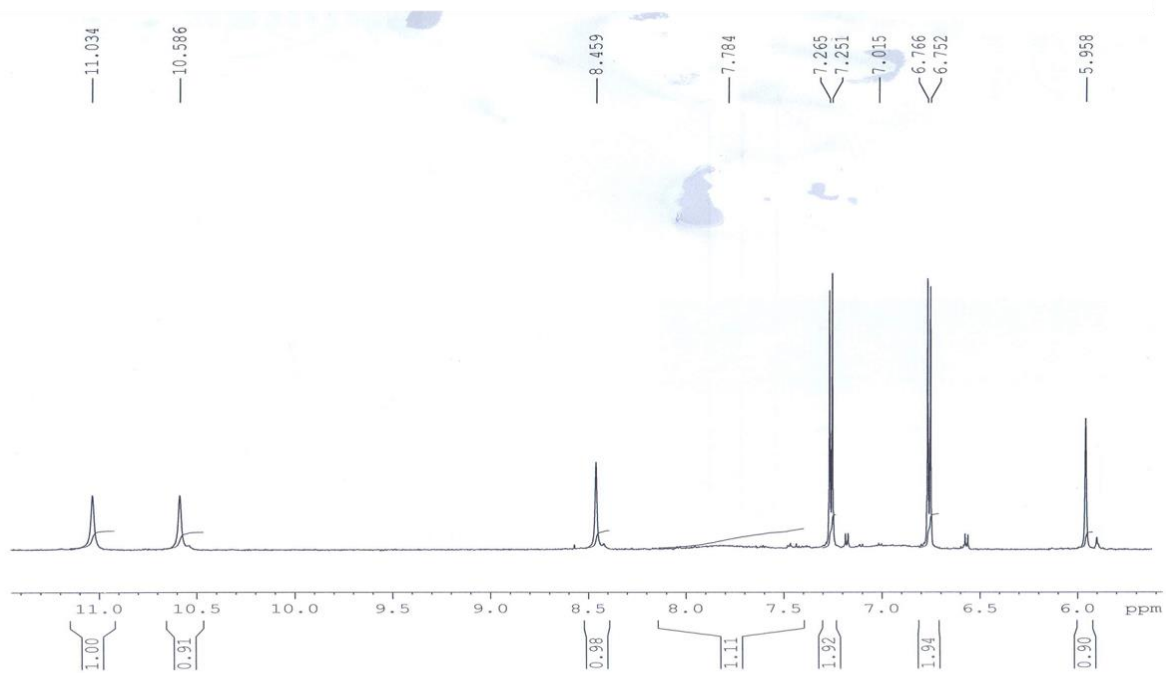

4j <sup>13</sup>C NMR spectrum (150 MHz, DMSO-d<sub>6</sub>).

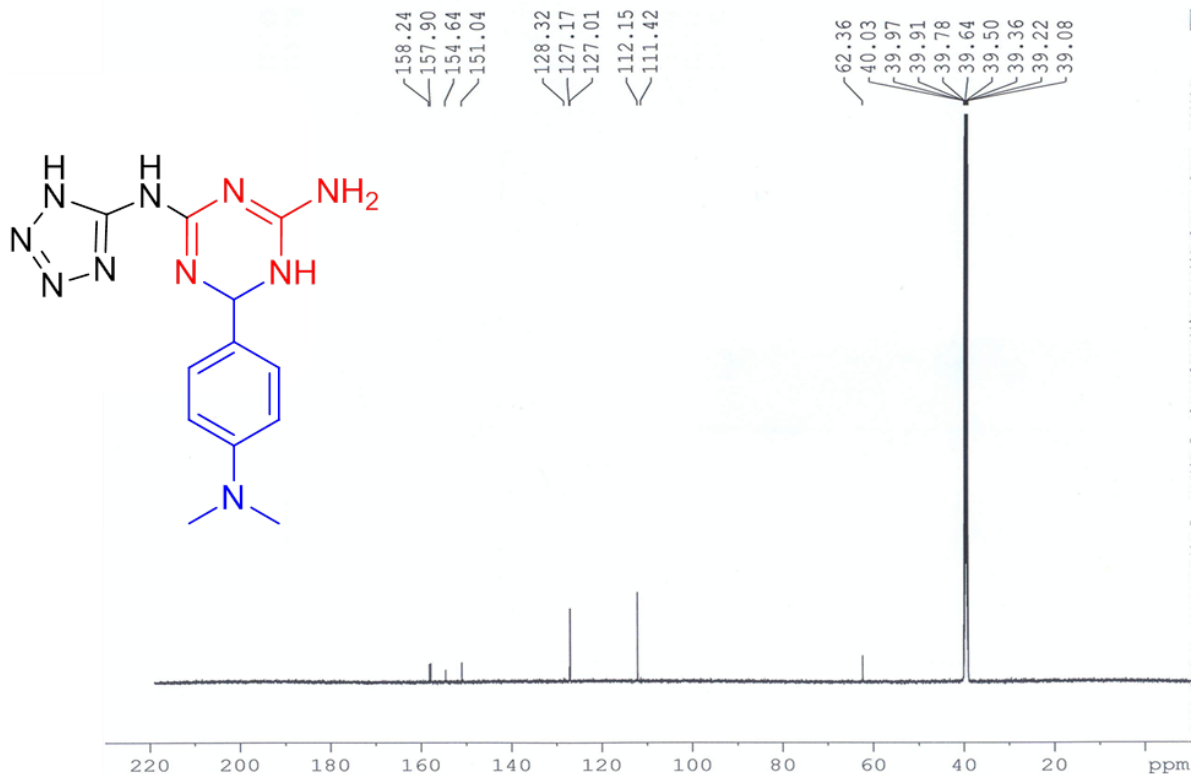

<sup>13</sup>C decoupled spectra Dr.Saleh K211 in DMSO

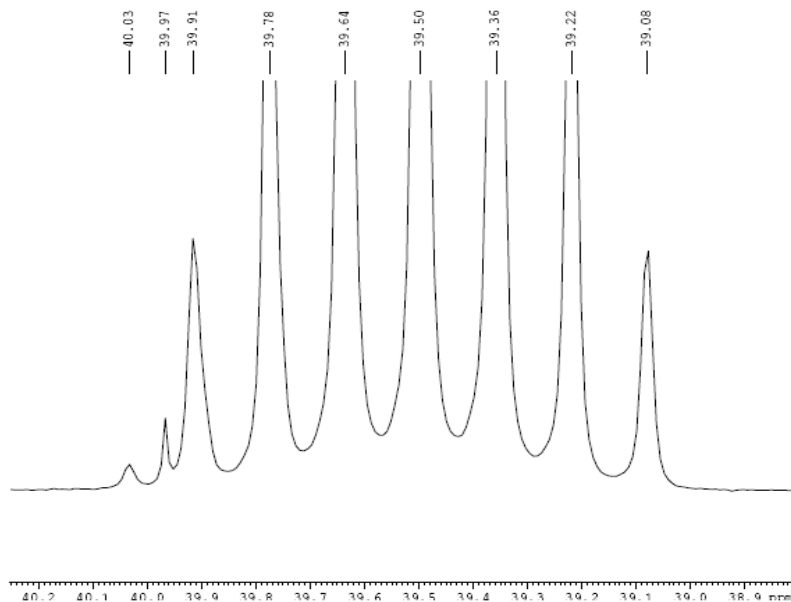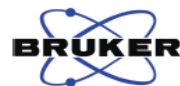

```

Current Data Parameters
NAME      K211
EXPNO    2
PROCNO   1

F2 - Acquisition Parameters
Date_    20190829
Time     9.42
INSTRUM  spect
PROBHD   5 mm PABBO BB-
PULPROG  zgpg30
TD       65536
SOLVENT  DMSO
NS       10240
DS       4
SWH      36057.691 Hz
FIDRES   0.550197 Hz
AQ       0.9087659 sec
RG       203
DM       13.867 usec
DE       60.00 usec
TE       298.0 K
D1       2.00000000 sec
D11      0.03000000 sec
TD0

===== CHANNEL f1 =====
SF01    150.9178979 MHz
NUC1    13C
P1      8.80 usec
PLW1    78.13500214 W

===== CHANNEL f2 =====
SF02    600.1324005 MHz
NUC2    1H
CPDPRG2 waltz65
PCPD2   70.00 usec
PLW2    27.82500076 W
PLW12   0.63804001 W
PLW13   0.31264001 W

F2 - Processing parameters
SI      32768
SF      150.9028824 MHz
WDW     EM
SSB     0
LB      1.00 Hz
GB      0
PC      1.40
    
```



<sup>13</sup>C decoupled spectra Dr.Saleh K211 in DMSO

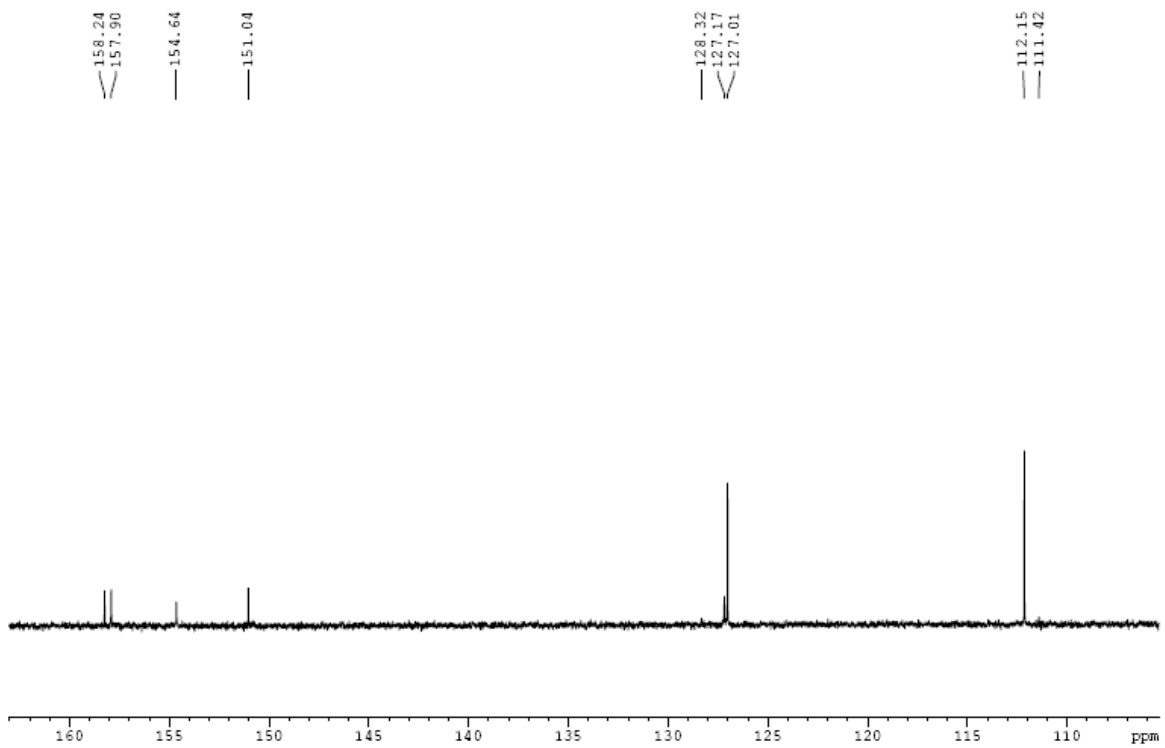

Supplement: Additional file 1 [file 1860-5397-16-142-S1.pdf]
